# Supplementary material for: Improved Light Harvesting of Fiber-Shaped Dye-Sensitized Solar Cells by Using a Bacteriophage Doping Method
Source: MDPI journal article supplement (doi:10.3390/nano11123421), 2021-12-17
Supplement: s1 [file s1]

# Improved Light Harvesting of Fiber-Shaped Dye-Sensitized Solar Cells by Using a Bacteriophage Doping Method

Sung-Jun Koo<sup>1,2,†</sup>, Jae Ho Kim<sup>1,†</sup>, Yong-Ki Kim<sup>3</sup>, Myunghun Shin<sup>3</sup>, Jin Woo Choi<sup>1</sup>, Jin-Woo Oh<sup>2,5,\*</sup>, Hyung Woo Lee<sup>2,4,\*</sup>, and Myungkwan Song<sup>1,\*</sup>

<sup>1</sup> Department of Energy and Electronic Materials, Korea Institute of Materials Science (KIMS), Changwon 51508, South Korea; sungun666@kims.re.kr (S.-J.K.); jho83@kims.re.kr (J.H.K.); jinwoo.choi@kims.re.kr (J.W.C.)

<sup>2</sup> Department of Nano Fusion Technology, Pusan National University, Busan 46241, South Korea

<sup>3</sup> School of Electronics and Information Engineering, Korea Aerospace University, Goyang 10540, South Korea; ygk3373@kau.kr (Y.-K.M.); mhshin@kau.ac.kr (M.Shin)

<sup>4</sup> Department of Nanoenergy Engineering and Research Center of Energy Convergence Technology, Pusan Natuional University, Busan 46241, South Korea

<sup>5</sup> Bio-IT Fusion Technology Research Institute, Pusan National University, Busan 46241, South Korea

<sup>†</sup> These authors contributed equally to this project.

\* Correspondence: ojw@pusan.ac.kr (J.-W.O.); LHW2010@pusan.ac.kr (H.W.L); smk1017@kims.re.kr (M.S.)

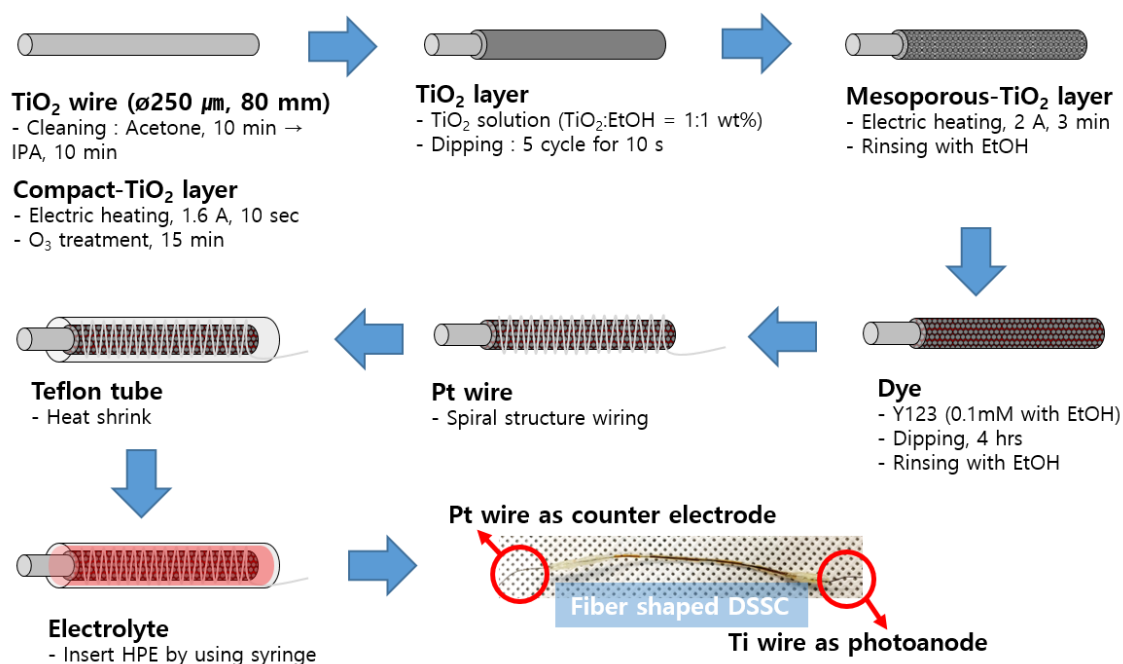

**Figure S1.** Schematic representation of the fabrication process of FDSSCs.

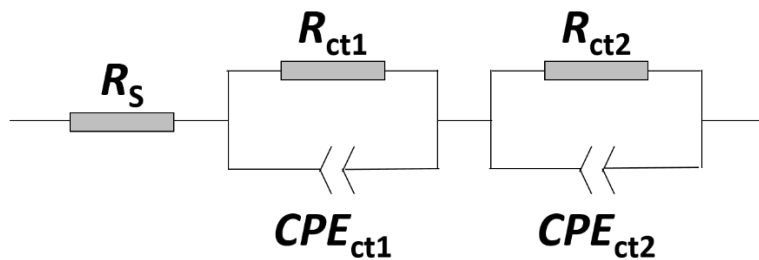

**Figure S2.** The equivalent circuit used for the EIS analysis.

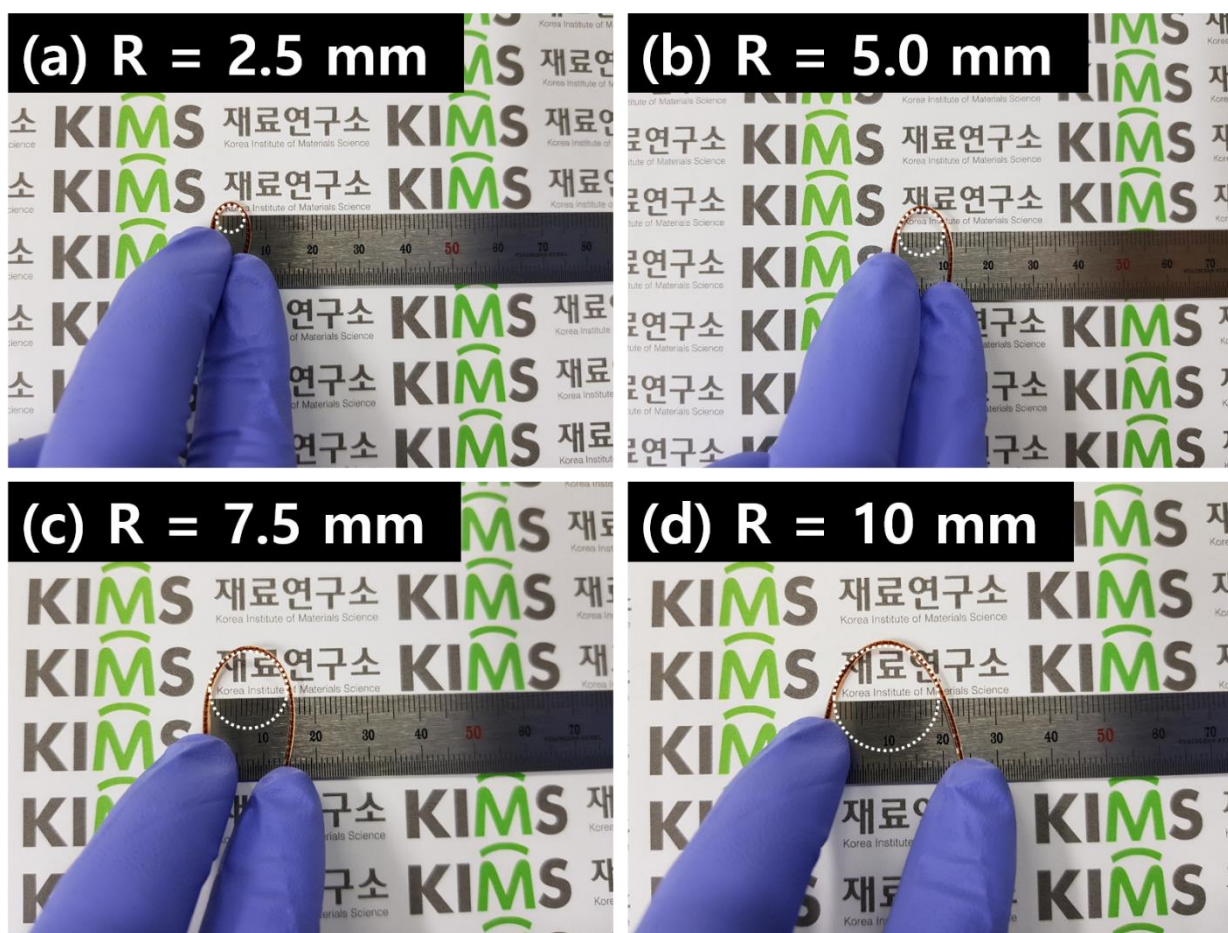

**Figure S3.** Photographs of Ag@M13 enhanced FDSSCs on bending with width of radius of (a) 0.25, (b) 0.5, (c) 0.75, and, (d) 1 cm.

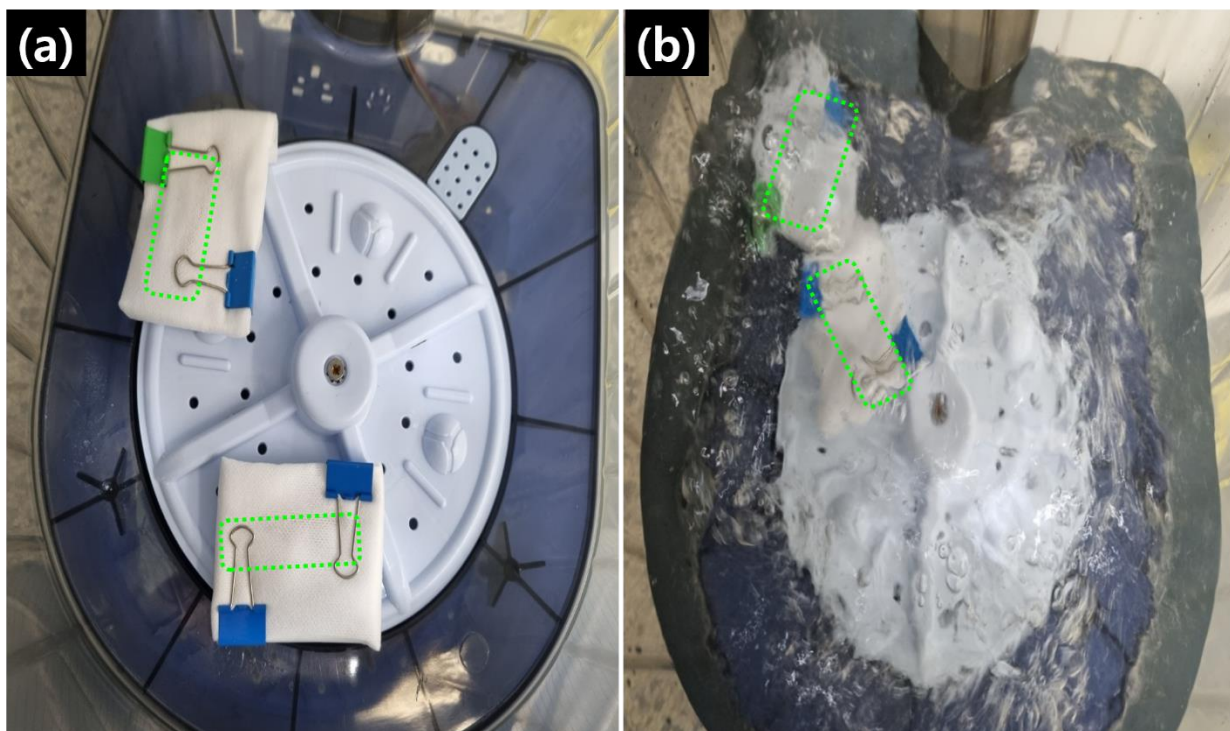

**Figure S4.** Photographs of Ag@M13 enhanced FDSSCs on being washed in a laundry net: (a) the laundry net enclosing the devices was placed in the washing machine, and (b) the laundry net and enclosed devices being washed.

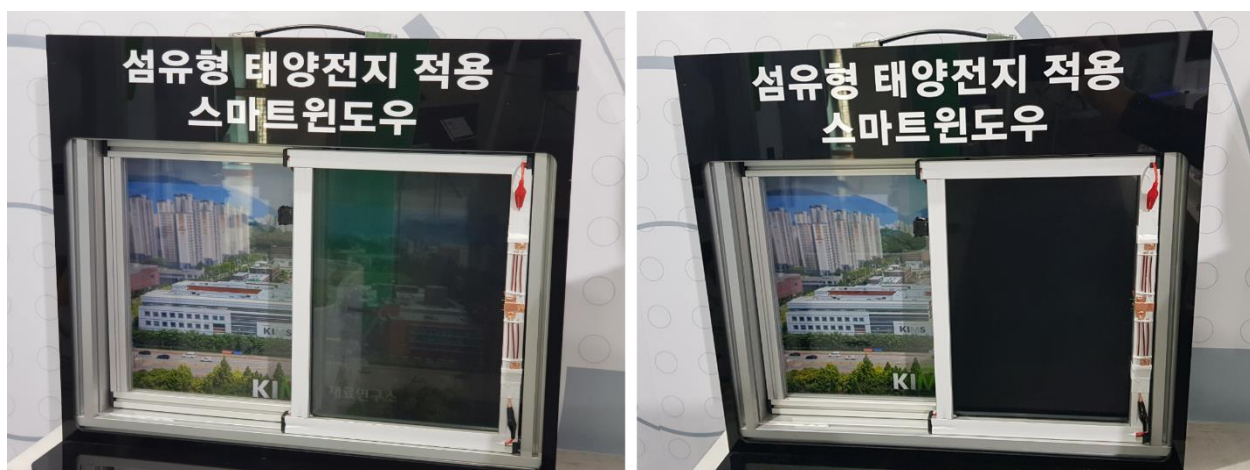

**Figure S5.** Photographs of Ag@M13 enhanced FDSSCs connected in series and parallel to drive liquid-crystal (LC) device.
